# Supplementary material for: Platinum recycling through electroless dissolution under mild conditions using a surface activation assisted Pt-complexing approach
Source: Royal Society of Chemistry journal article supplement (doi:10.1039/c9cp06066a), 2020-01-01
Supplement: c9cp06066a1.pdf [file c9cp06066a1.pdf]

**Supplementary information to “Platinum recycling through electroless dissolution under mild conditions using a surface activation assisted Pt-complexing approach”**

Raghunandan Sharma\*, Per Morgen, and Shuang Ma Andersen\*

*Department of Chemical Engineering, Biotechnology and Environmental Technology, University of*

*Southern Denmark, Campusvej 55, DK-5230 Odense M, Denmark*

**Corresponding authors:** mashu@kbnm.sdu.dk (S.M.A.), sharmariitk@gmail.com (R.S.)

**S1: Non-oxide passivation layer removal through cycling**

(a) Effect of presence of oxygen

Removal of oxygen decreases the dissolution even when the solution had a convection flow due to nitrogen purging (Fig. S1).

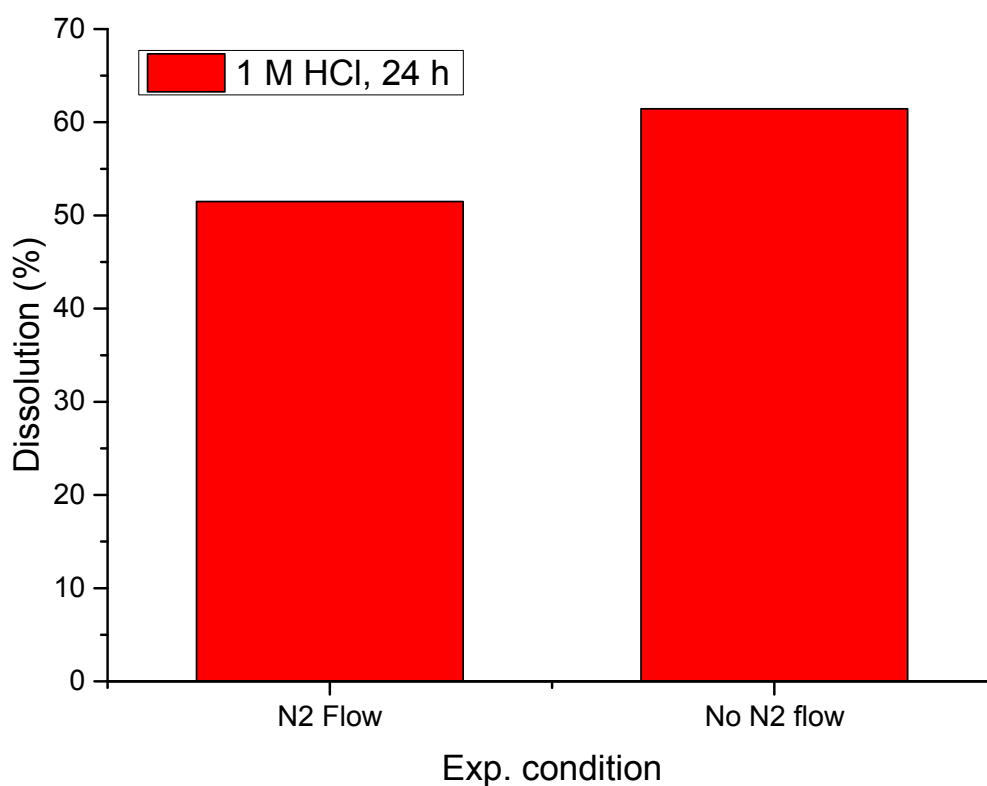

Fig. S1: Pt dissolution with/without N<sub>2</sub> bubbling

(b) Cl<sup>-</sup> cycling

Activation through H<sub>2</sub>SO<sub>4</sub> (dipping the electrode in 1 M H<sub>2</sub>SO<sub>4</sub> for ~2 min after every 30 min. holding in 1 M HCl) was performed to observe the effect of Cl<sup>-</sup> cycling on the passivation layer. The Cl<sup>-</sup> cycling shows marginal increment of the rate of Pt dissolution (Fig. S2)

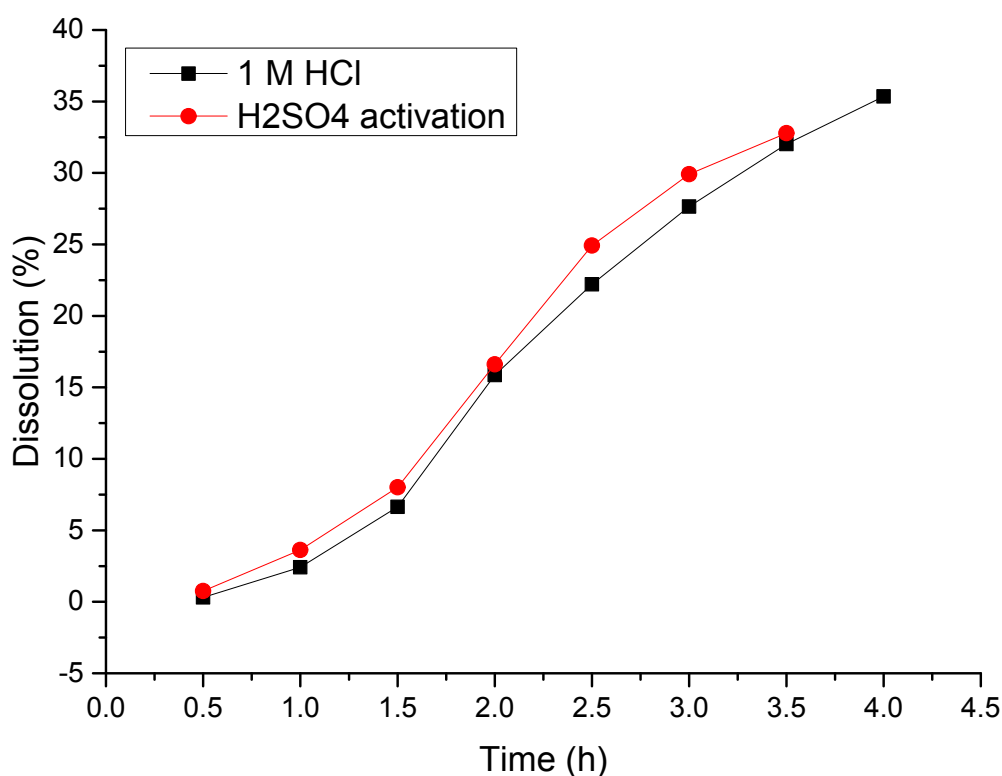

Fig. S2: Pt dissolution with/without Cl<sup>-</sup> cycling

**S2: Electrochemical observation of passivation layer**

Cyclic voltammograms of different post-dissolution study electrodes recorded in 1 M H<sub>2</sub>SO<sub>4</sub> between 1.2 and 0.02 V at a scan rate of 100 mV/s (starting potential: 1.2 V) have been shown in Fig S3. The cathodic sweep exhibits a strong peak around 0.4 V, which corresponds to a reduction reaction on the Pt surface. For the electrodes pretreated in 1 M H<sub>2</sub>SO<sub>4</sub> or 1 M HNO<sub>3</sub> (1h) the peak corresponds to

reduction of the Pt-oxides. However, for the Pt treated with 1 M HCl (dissolution study, 3h), the cathodic peak appears at a comparatively lower potential, indicating stronger adsorption or presence of species with stability higher as compared to that of the surface Pt-oxide layer. This indicates the formation of a non-oxide passivation layer during the Pt dissolution study in 1 M HCl.

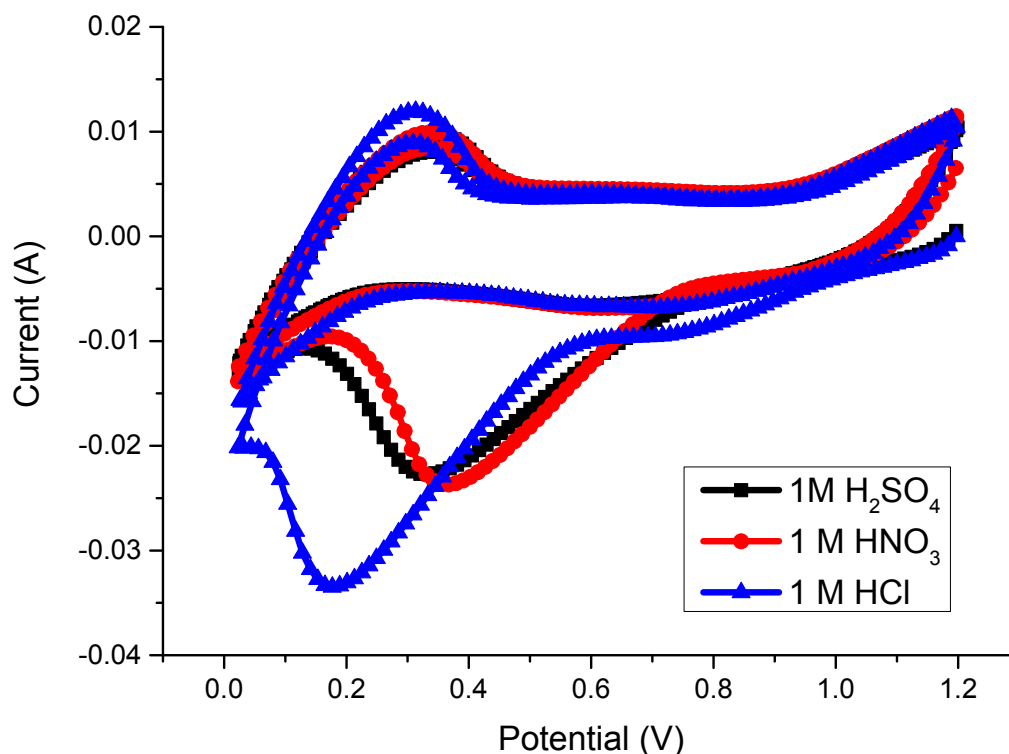

Fig. S3: Cyclic voltammograms of the electrodes exposed to different electrolytes. The voltammograms have been recorded in 1 M H<sub>2</sub>SO<sub>4</sub> at a scan rate of 100 mV/s.

### S3: EDMC in presence of ethanol in the electrolyte

Presence of species which could get adsorbed on the Pt surface may reduce the rate of dissolution. As an example, Fig. S4 compares %dissolution values for an EDMC duration of 24 h (without activation cycling) in 1 M HCl electrolytes with and without ~1 vol.% ethanol (other conditions being identical to those described under experimental section). Significantly lower %dissolution in presence of ethanol suggested passivation of the surface through ethanol absorption.

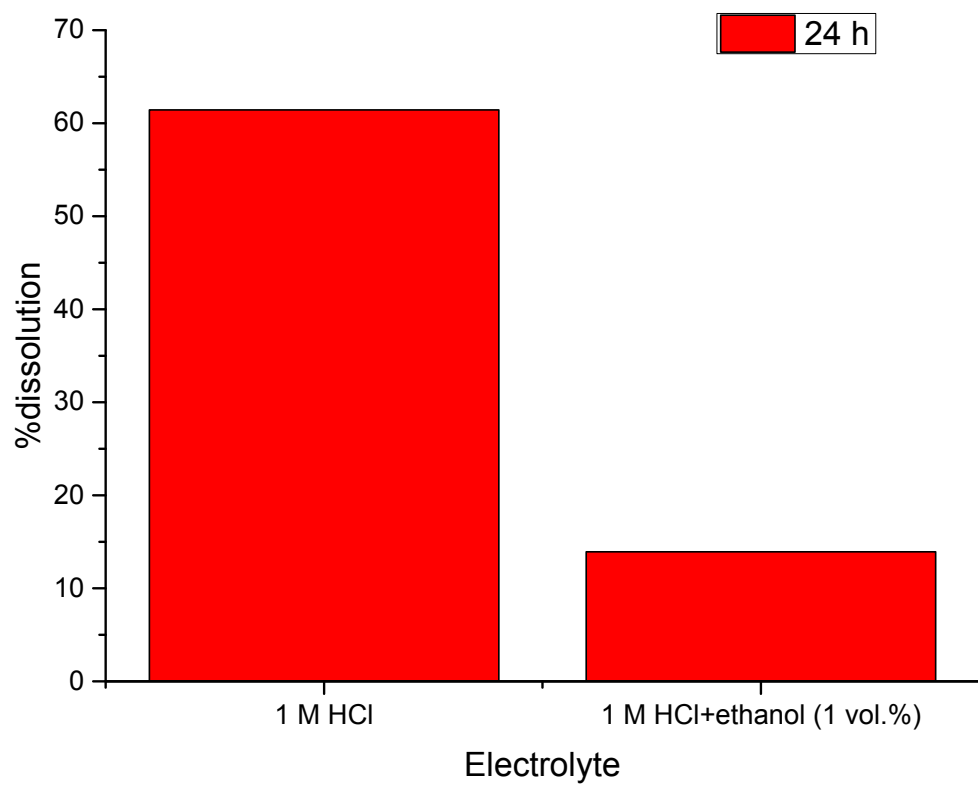

Fig. S4: Effect of presence of ethanol on the rate of dissolution of Pt through EDMC in 1 M HCl.
